# Supplementary material for: The draft genome sequence of a desert tree Populus pruinosa
Source: PubMed Central journal article supplement (PMC5603765; doi:10.1093/gigascience/gix075), 2017-08-08
Supplement: gix075_GIGA-D-16-00147_Revision-2.pdf [file gix075_GIGA-D-16-00147_Revision-2.pdf]

1        1    **The draft genome sequence of a desert tree *Populus pruinosa***

2            2        Wenlu Yang<sup>1</sup>, Kun Wang<sup>1</sup>, Jian Zhang<sup>2</sup>, Jianchao Ma<sup>2</sup>, Jianquan Liu<sup>1,2</sup>, Tao Ma<sup>1\*</sup>

3  
4  
5        3  
6  
7        4        <sup>1</sup>MOE Key Laboratory for Bio-resources and Eco-environment, College of Life  
8  
9        5        Science, Sichuan University, Chengdu, China

10  
11       6        <sup>2</sup>State Key Laboratory of Grassland Agro-Ecosystem, College of Life Science, Lanzhou  
12  
13       7        University, Lanzhou, China

14  
15       8        \*Correspondence should be addressed to T. M. (matao.yz@gmail.com)

16  
17  
18       9  
19  
20  
21  
22  
23  
24  
25  
26  
27  
28  
29  
30  
31  
32  
33  
34  
35  
36  
37  
38  
39  
40  
41  
42  
43  
44  
45  
46  
47  
48  
49  
50  
51  
52  
53  
54  
55  
56  
57  
58  
59  
60  
61  
62  
63  
64  
65

## Abstract

## Background

*Populus pruinosa* is a large tree that grows in deserts and shows distinct differences in both morphology and adaptation from those of its sister species, *P. euphratica*. Here we present a draft genome sequence for *P. pruinosa* and examine genomic variations between the two species.

## Findings

A total of 60 Gb of clean reads from whole-genome sequencing of a *P. pruinosa* individual were generated using the Illumina HiSeq2000 platform. The assembled genome is 479.3 Mb in length, with an N50 contig size of 14.0 kb and a scaffold size of 698.5 kb. 45.47% of the genome is composed of repetitive elements. We predicted 35,131 protein-coding genes, of which 88.06% were functionally annotated. Gene family clustering revealed 224 unique and 640 expanded gene families in the *P. pruinosa* genome. Further evolutionary analysis identified numerous genes with elevated values for pairwise genetic differentiation between *P. pruinosa* and *P. euphratica*.

## Conclusions

We provide the genome sequence and gene annotation for *P. pruinosa*. A large number of genetic variations were recovered by comparison of the genomes between *P. pruinosa* and *P. euphratica*. These variations will provide a valuable resource for studying the genetic bases for the phenotypic and adaptive divergence of the two sister species.

## Keywords

*Populus pruinosa*, Illumina sequencing, Genome assembly, Annotation

## 35 **Background**

36 Poplars (*Populus* spp.) are widely distributed and cultivated, and they have both  
37 economic and ecological importance. Many resequencing based studies have been  
38 conducted to identify genetic variations responsible for their phenotypic and adaptive  
39 diversity observed in nature [1-4]. However, comparative studies based on *de novo*  
40 genome assemblies are still in their infancy, since presently only two reference genomes  
41 are available for poplar species, namely *P. trichocarpa* (Torr. & Gray) [5] and *P.*  
42 *euphratica* Oliv. [6]. Further development of genome resources will offer a unique  
43 opportunity for comparative genomics and evolutionary studies within this tree genus.  
44 *P. pruinosa* Schrenk, the sister species of *P. euphratica* [7], is a large tree distributed  
45 in the deserts of western China and adjacent regions [8]. These two species are  
46 morphologically well differentiated. The leaves of *P. pruinosa* are ovate or kidney-  
47 shaped with thick hairs, whereas *P. euphratica* has glabrous leaves with heteroblastic  
48 development. Although both species are well adapted to extreme desert environments,  
49 they grow in the distinct desert habitats: *P. pruinosa* is distributed in deserts where there  
50 is highly saline underground water close to the surface, while *P. euphratica* occurs in  
51 dry deserts in which the water is deep underground and less saline [8-10]. Previous  
52 comparisons of the transcriptomes of these two sister species suggest that they may  
53 have developed enough genetic divergence to make it possible for them to adapt to  
54 these distinct desert habitats [9, 10]. Genomic resources and comparative genomic  
55 analysis of these two species would accelerate our understanding of the processes of  
56 genomic evolution underlying their phenotypic and adaptive divergence. Here we  
57 report a draft genome assembly for *P. pruinosa* and present an initial comparative  
58 genomics analysis of *P. pruinosa* and *P. euphratica*. We recovered a large number of  
59 genetic variations including high level of heterozygosity, several genes undergone rapid  
60 evolution and numerous gene families unique and expanded in *P. pruinosa* genome.

61

## Data description

### Samples and Sequencing

High-quality genomic DNA was extracted from the leaf tissues of a single *P. pruinosa* tree (NCBI Taxonomy ID: 492479) collected in Xinjiang, China, using the cetyl trimethylammonium bromide (CTAB) method. Sequencing libraries with different insert sizes were constructed according to the Illumina protocol. Briefly, for paired-end libraries with insert sizes ranging from 158 to 780 bp, DNA was fragmented, end repaired, A-tailed and ligated to Illumina paired-end adapters (Illumina). The ligated fragments were size selected on agarose gel and amplified by ligation-mediated PCR to produce the corresponding libraries. For mate pair libraries (2 to 20 kb), about 20-50  $\mu\text{g}$  genomic DNA was fragmented using nebulization for 2 kb or HydroShear (Covaris) for 5, 10 and 20 kb. Next, the DNA fragments were end-repaired using biotinylated nucleotide analogues and purified using QIAquick PCR Purification Kit (Qiagen). Then the target fragments were selected on agarose gel and circularized by intramolecular ligation. Circular DNA was fragmented (Covaris) and biotinylated fragments were purified with magnetic beads (Invitrogen), end-repaired, A-tailed and ligated to Illumina paired-end adapters, size-selected again and purified with QIAquick Gel Extraction kit (QIAGEN). All of the above libraries were sequenced on an Illumina HiSeq 2000 platform. For the data filtering process, we discarded reads that met either of the following criteria: (1) reads with  $\geq 10\%$  unidentified nucleotides; (2) reads from paired-end libraries having more than 40% bases with Phred quality  $< 8$ , and reads from mate pair libraries that contained more than 60% bases with the quality  $< 8$ ; (3) reads with more than 10 bp aligned to the adapter sequence, allowing  $< 4$  bp mismatch; (4) reads from paired-end libraries that overlapped  $\geq 10$  bp with the corresponding paired end. We also corrected the reads containing sequencing errors and removed the duplicates introduced by PCR amplification in paired reads using Lighter v1.0.7 [11] and FastUniq v1.1 [12], respectively. Finally,  $\sim 60$  Gb of clean data (Additional file 1: Table S1) were obtained for the *de novo* assembly of the *P. pruinosa* genome.

1  
2  
3  
4  
5  
6  
7  
8  
9  
10  
11  
12  
13  
14  
15  
16  
17  
18  
19  
20  
21  
22  
23  
24  
25  
26  
27  
28  
29  
30  
31  
32  
33  
34  
35  
36  
37  
38  
39  
40  
41  
42  
43  
44  
45  
46  
47  
48  
49  
50  
51  
52  
53  
54  
55  
56  
57  
58  
59  
60  
61  
62  
63  
64  
65

90 Clean reads obtained from paired-end libraries were subjected to 17-mer frequency  
91 distribution analysis with KmerFreq\_AR [13]. Analysis parameters were set at -k 17 -t  
92 10 -q 33, and the final result was plotted as a frequency graph (Additional file 1: Figure  
93 S1). Two distinctive peaks observed from the distribution curve demonstrated the high  
94 heterozygosity of the *P. pruinosa* genome. To prevent the deviation of *k*-mer based  
95 methods on the estimation of genome size, we determined the genome size of *P.*  
96 *pruinosa* with flow cytometry, using *Vigna radiata* as reference standard and propidium  
97 iodide as the stain. Our flow cytometry analysis showed that the genome size of *P.*  
98 *pruinosa* was approximately 590 Mb (Additional file 1: Figure S2).

99 In addition, three tissues (leaf, phloem and xylem) of a 2-year-old *P. pruinosa* plant  
100 collected from Tarim Basin desert in Xinjiang were harvested and flash frozen in liquid  
101 nitrogen, and then the RNA were extracted using CTAB method [14]. RNA-seq libraries  
102 were constructed using NEB Next Ultra Directional RNA Library Prep Kit for Illumina  
103 (NEB, Ipswich, USA) according to the manufacturer's instructions, and libraries were  
104 sequenced using an Illumina HiSeq 2500 platform with a read length of 2×125 bp. Over  
105 38 million paired-end reads were generated for each sample (Additional file 1: Table  
106 S2). We next assembled these RNA-seq reads using Trinity v2.1.1 [15] with the default  
107 parameters and reduced the redundancy of transcript sequences (>95% similarity) using  
108 CD-Hit v4.6.1 [16]. The software TransDecoder v2.1.0 [17] was used to identify  
109 candidate coding regions within these transcript sequences. Finally, a total of 111,538  
110 unigenes were obtained for subsequent evaluation of gene space completeness of our  
111 genome assembly and transcriptome-based gene prediction.

## 112 **Genome assembly**

113 The *P. pruinosa* genome was *de novo* assembled by Platanus v1.2.1 [18] with default  
114 parameter (-k 32), which is optimized for highly heterozygous diploid genomes. Briefly,  
115 the clean reads derived from paired-end libraries were firstly split into *k*-mers to  
116 construct *de Bruijn* graphs and merged into distinct contigs based on overlap

1 117 information. All reads from paired-end and mate pair libraries were then aligned against  
2 118 the contigs and the paired relationships were used to link contigs into scaffolds. Finally,  
3 119 the intra-scaffold gaps were closed by local assembly implemented in GapCloser v1.12  
4 120 [19] using the paired-end reads for which one end uniquely mapped to a contig but the  
5 121 other end was located within a gap. After discarding the scaffolds smaller than 200 bp,  
6 122 we yielded a draft assembly with a total length of 479.3 Mb (Table 1), which covers  
7 123 85% of the predicted genome size of *P. pruinosa*. The contig and scaffold N50 sizes  
8 124 were 14.0 kb and 698.5 kb respectively, while the unclosed gap regions represent 6.08%  
9 125 of the assembly (Additional file 1: Table S3). The distribution of the average GC  
10 126 content of the *P. pruinosa* genome (mean: 31.8%) is similar to that for the *P. euphratica*  
11 127 genome [6] (32.1%) and the *P. trichocarpa* genome [5] (33.6%) (Additional file 1:  
12 128 Figure S3).

129 To evaluate the completeness of this assembly, we first examined the coverage of  
130 highly conserved genes using BUSCO [20]. The result showed that 922 out of the 956  
131 conserved genes (96.44%) could be found in our assembly, of which 699 were single  
132 and 223 were duplicated, and only 10 (1.05%) genes had fragmented matches  
133 (Additional file 1: Table S4). These coverage values were comparable to estimates for  
134 the *P. euphratica* and *P. trichocarpa* genomes. Furthermore, the 111,538 *P. pruinosa*  
135 unigenes obtained in this study and the protein-coding genes predicted in the *P.*  
136 *euphratica* and *P. trichocarpa* genomes [5, 6] were aligned to our genome assembly  
137 using the BLAT algorithm with default parameters. Statistics analysis were done at  
138 different levels of percentage of sequence homology and percentage of coverage. The  
139 results showed that our assembly covered approximately 90% of the *P. pruinosa*  
140 unigenes, 99% and 98% of the protein-coding genes in *P. euphratica* and *P. trichocarpa*  
141 respectively (Additional file 1: Table S5). Finally, we applied the FRC v1.3.0 (Feature-  
142 Response Curves) method [21] to evaluate the trade-off between the contiguity and  
143 correctness of our assembly. This method is based on a prediction of assembly  
144 correctness by identifying on each *de novo* assembled scaffold, ‘features’ representing  
145 potential errors or complications during the assembly process. Evaluation using FRC

146 method and our genome sequencing reads indicated that the *P. pruinosa* genome  
147 assembly certainly generated a better FRCurve than the other three Salicaceae species  
148 assemblies (Additional file 1: Figure S4), suggesting that the continuity of our assembly  
149 is acceptable. In summary, all of these statistics revealed that our draft genome sequence  
150 has high contiguity, accuracy, and more important, high degree of gene space  
151 completeness for effective gene detection.

152 We mapped the clean reads from the paired-end libraries to the *P. pruinosa* genome  
153 using the Burrows-Wheeler Aligner (BWA v0.7.12-r1044) [22] and found that the  
154 sequencing depth for 95.3% of the assembly was more than 20-fold (Additional file 1:  
155 Figure S5), ensuring a high level of accuracy at the nucleotide level. We also performed  
156 variant calling using the Genome Analysis Toolkit (GATK v3.5) [23]. A total of 3.11  
157 million heterozygous single nucleotide variants (SNVs) were obtained after strict  
158 quality control and filtering, which revealed that the heterozygosity level of the *P.*  
159 *pruinosa* genome was approximately 0.80%.

## 160 **Repeat annotation**

161 Repetitive sequences and transposable elements (TEs) in the *P. pruinosa* genome were  
162 identified using a combination of *de novo* and homology-based approaches at both the  
163 DNA and the protein level. Initially, we built a *de novo* repeat library for *P. pruinosa*  
164 using RepeatModeler v1.0.8 [24] with default parameters. For identification and  
165 classification of transposable elements at the DNA level, RepeatMasker [24] was  
166 applied to map our assembly against both the databases that we had built and the known  
167 Repbase [25] transposable element (TE) library. Next we executed RepeatProteinMask  
168 [24] using a WU-BLASTX search against the TE protein database to further identify  
169 repeats at the protein level. In addition, we annotated tandem repeats using the software  
170 Tandem Repeat Finder (TRF v4.07b) [26]. In total, the combined non-redundant results  
171 showed that approximately 45% of the *P. pruinosa* genome assembly is composed of  
172 repetitive elements (Additional file 1: Table S6), a value similar to that for the *P.*

173 *euphratica* genome (44%). Long terminal repeats (LTRs) were the most abundant  
174 repeat class, accounting for 67.03% of repetitive sequences representing 29.82% of the  
175 genome (Additional file 1: Table S7).

## 176 **Gene annotation**

177 We conducted the gene annotation in the *P. pruinosa* genome by combining homology-  
178 based, *de novo* and transcriptome-based methods. For homology-based prediction,  
179 protein sequences from six sequenced plants (*P. euphratica* [6], *P. trichocarpa* [5],  
180 *Ricinus communis* [27], *Arabidopsis thaliana* [28], *Carica papaya* [29] and *Eucalyptus*  
181 *grandis* [30]) were aligned to the *P. pruinosa* genome using TBLASTN v2.2.26 [31].  
182 The homologous genome sequences were then aligned against the matching proteins  
183 using GeneWise v2.4.1 [32] to obtain accurate spliced alignments. For *de novo*  
184 prediction, we performed Augustus v3.2.1 [33] and GenScan [34] analysis on the  
185 repeat-masked genome with parameters trained from *P. pruinosa* and *A. thaliana*. The  
186 resultant data sets were filtered with the removal of partial sequences and genes with  
187 coding length less than 100 bp. For transcriptome-based approach, the 111,538 *P.*  
188 *pruinosa* transcripts obtained above were aligned to the *P. pruinosa* genome and further  
189 assembled using the Program to Assemble Spliced Alignments (PASA v2.0.2) [35] to  
190 detect likely protein coding regions. Finally, we combined the gene annotation results  
191 from all homology-based, *de novo* and transcriptome-based predictions using EVM  
192 v1.1.1 [36] to produce a consensus protein-coding gene set.

193 In sum, the *P. pruinosa* genome contains 35,131 protein-coding genes with an average  
194 CDS length of 1,224 bp (Additional file 1: Table S8). The length distributions of  
195 transcripts, coding sequences, exons and introns were similar in *P. euphratica* and in *P.*  
196 *trichocarpa* (Additional file 1: Figure S6). Functional annotation was performed based  
197 on comparisons with the SwissProt, TrEMBL [37], InterPro [38] and KEGG [39]  
198 protein databases. Gene Ontology (GO) [40] IDs for each gene were assigned by the  
199 Blast2GO pipeline [41] based on NCBI databases. Overall, 75.43% of the protein-



1  
2  
3  
4  
5  
6  
7  
8  
9  
10  
11  
12  
13  
14  
15  
16  
17  
18  
19  
20  
21  
22  
23  
24  
25  
26  
27  
28  
29  
30  
31  
32  
33  
34  
35  
36  
37  
38  
39  
40  
41  
42  
43  
44  
45  
46  
47  
48  
49  
50  
51  
52  
53  
54  
55  
56  
57  
58  
59  
60  
61  
62  
63  
64  
65

200 coding genes had conserved protein domains and 63.64% could be classified by GO  
201 terms (Additional file 1: Table S9).

## 202 **Evolutionary analysis**

203 Blocks syntenic between *P. pruinosa* and *P. euphratica* were determined by the software  
204 MCScanX [42], at least five genes were required to call synteny. The blocks identified  
205 occupy the majority of the genome assemblies of *P. pruinosa* (290 Mb, 66% of the  
206 assembly; 29,015 genes, 83% of the predicted gene models) and *P. euphratica* (293 Mb,  
207 59%; 27,804 genes, 81%) (Additional file 1: Table S10), suggesting that there is  
208 extensive macrosynteny between these two species. This overall high level of synteny  
209 was also confirmed by whole-genome alignment using the program ‘LAST’ [43] (Fig.  
210 1). A total of 15,695 high-confidence 1:1 orthologous genes were identified in these  
211 syntenic blocks. We estimated and plotted the nucleotide synonymous substitution (Ks)  
212 rates for these orthologous pairs, and a peak at around 0.016 was observed (Additional  
213 file 1: Figure S7), while the divergence between duplicated genes in *P. pruinosa* and *P.*  
214 *euphratica* peaked around 0.272 and 0.257, respectively, indicating that the two species  
215 had shared common whole genome duplication (WGD) events before they diverged  
216 from a common ancestor. Adaptive divergence at the molecular level may be reflected  
217 in an increased rate of nonsynonymous changes within genes involved in adaptation  
218 [44]. We found that the mean similarity between *P. euphratica* and *P. pruinosa*  
219 orthologous genes at the protein level is close to 97.22% (Additional file 1: Figure S8).  
220 Average synonymous (Ks) and nonsynonymous (Ka) gene divergence values were 0.04  
221 and 0.017 respectively. The genes that showed elevated pairwise genetic differentiation  
222 were enriched mainly in ‘metal ion transport’, ‘regulation of gene expression’,  
223 ‘response to stimulus’, ‘antiporter activity’, ‘heat shock protein binding’ and  
224 ‘oxidoreductase activity’ terms (Additional file 1: Table S11), indicating that these  
225 functions had undergone rapid evolution (caused by adaptive divergence and/or relaxed  
226 selection) between *P. pruinosa* and *P. euphratica*.

1 227 Gene family clustering analysis were performed using OrthoMCL v3.1 [45] on all the  
2 228 protein-coding genes of *P. pruinosa* and 10 additional species (*P. euphratica*, *P.*  
3 229 *trichocarpa*, *Salix suchowensis*, *Ricinus communis*, *Arabidopsis thaliana*, *Carica*  
4 230 *papaya*, *Fragaria vesca*, *Cucumis sativus*, *Eucalyptus Grandis* and *Vitis vinifera*). Of  
5 231 the 35,131 protein-coding genes in *P. pruinosa*, 28,773 (81.9%) could be classified into  
6 232 a total of 17,592 families, with 224 clusters comprising 662 genes being specific to *P.*  
7 233 *pruinosa* (Additional file 1: Table S12). We identified a total of 7,020 *P. pruinosa*-  
8 234 specific genes, of which 3,639 (51.8%) were supported by gene expression data  
9 235 (RPKM > 0.5) and/or functional annotation (Additional file 1: Table S13), indicating  
10 236 that there are a large number of species-specific genes even though the genomes of *P.*  
11 237 *pruinosa* and *P. euphratica* are closely related to each other. Further analysis revealed  
12 238 that these *P. pruinosa*-specific genes were primarily enriched in ‘transcription factor  
13 239 activity’, ‘transporter activity’, ‘response to salt stress’ and ‘oxidoreductase activity’  
14 240 (Additional file 1: Table S14).

15 241 In addition, we identified a total of 1,354 single-copy gene families across the 11 plant  
16 242 genomes. Alignments were generated for each family with MUSCLE v3.8.31 [46] and  
17 243 low quality regions of the alignments were identified and trimmed with Gblocks v0.91b  
18 244 [47, 48] using default parameters. The individual trimmed protein-coding alignments  
19 245 were concatenated into one ‘super gene’ for each species in order to construct a  
20 246 phylogenetic tree using RAxML v8.2.8 [49] (Additional file 1: Figure S9). Then  
21 247 MCMCTree v4.9 [50] was applied to estimate the divergence time based on the  
22 248 phylogenetic relationships, using fossil calibration times for divergence between *A.*  
23 249 *thaliana* and *C. papaya* (54-90 million years ago, Mya), *A. thaliana* and *R. communis*  
24 250 (95-109 Mya), *V. vinifera* and *A. thaliana* (106-119 Mya), which were obtained from  
25 251 the TimeTree database (<http://www.timetree.org/>). The divergence time between *P.*  
26 252 *pruinosa* and *P. euphratica* was estimated to be 3.0 (1.6-5.0) Mya (Additional file 1:  
27 253 Figure S10). Lastly we applied the CAFÉ (Computational Analysis of gene Family  
28 254 Evolution, v3.1) [51] program to examine gene family evolution across entire genomes.  
29 255 The results showed that 640 gene families related to ‘Glucosyltransferase activity’,

1  
2  
3  
4  
5  
6  
7  
8  
9  
10  
11  
12  
13  
14  
15  
16  
17  
18  
19  
20  
21  
22  
23  
24  
25  
26  
27  
28  
29  
30  
31  
32  
33  
34  
35  
256 'ADP binding', 'Cation channel activity', 'Cell differentiation' and 'Oxidoreductase  
257 activity' were substantially expanded in *P. pruinosa* compared to other plant species  
258 (Additional file 1: Table S15 and Figure S11).

259 In summary, we present here the sequencing, assembly and annotation of the genome  
260 of *P. pruinosa*, and compare it with that of its sister species *P. euphratica*. Although a  
261 high level of overall similarity was observed between the two genomes, our  
262 evolutionary analyses identified a large number of genes showing signs of rapid  
263 divergence and numerous species-specific genes, which may have resulted from rapid  
264 habitat adaptation and natural selection during speciation of the two species. However,  
265 population genomic analyses will be needed in order to examine whether these  
266 variations are widely fixed across all populations of each species. In addition, functional  
267 tests should be performed to explore the roles that variations play in both morphological  
268 and ecological divergence.

269

## 270 **Acknowledgement**

271 This project was supported by the National Key Research and Development Program  
272 of China (2016YFD0600101), the National Key Project for Basic Research  
273 (2012CB114504), the National Natural Science Foundation of China (31561123001  
274 and 31500502) and the Fundamental Research Funds for the Central Universities.

275

## 276 **Availability of supporting data**

277 The sequencing reads from each sequencing library have been deposited at NCBI with  
278 the Project ID: PRJNA353148, Sample ID: SAMN06011208. The assembly and  
279 annotation of the *P. pruinosa* genome, the assembly pipeline and commands used in  
280 this work are available in the *GigaScience* database, GigaDB [52]. All supplementary  
281 figures and tables are provided in Additional file 1.

282

## 283 Competing interests

284 The authors declare that they have no competing interests.

## 286 References

- 287 1. Evans LM, Slavov GT, Rodgers-Melnick E, Martin J, Ranjan P, Muchero W, Brunner AM,  
288 Schackwitz W, Gunter L, Chen JG *et al*: **Population genomics of *Populus trichocarpa***  
289 **identifies signatures of selection and adaptive trait associations.** *Nature genetics* 2014,  
290 **46(10):1089-1096.**
- 291 2. Wang J, Street NR, Scofield DG, Ingvarsson PK: **Variation in linked selection and**  
292 **recombination drive genomic divergence during allopatric speciation of european and**  
293 **american aspens.** *Molecular biology and evolution* 2016, **33(7):1754-1767.**
- 294 3. Pinosio S, Giacomello S, Faivre-Rampant P, Taylor G, Jorge V, Le Paslier MC, Zaina G, Bastien  
295 C, Cattonaro F, Marroni F *et al*: **Characterization of the poplar pan-genome by genome-wide**  
296 **identification of structural variation.** *Molecular biology and evolution* 2016, **33(10):2706-**  
297 **2719.**
- 298 4. Christe C, Stolting KN, Paris M, Fraïsse C, Bierne N, Lexer C: **Adaptive evolution and**  
299 **segregating load contribute to the genomic landscape of divergence in two tree species**  
300 **connected by episodic gene flow.** *Molecular Ecology* 2017, **26(1):59-76.**
- 301 5. Tuskan GA, Difazio S, Jansson S, Bohlmann J, Grigoriev I, Hellsten U, Putnam N, Ralph S,  
302 Rombauts S, Salamov A *et al*: **The genome of black cottonwood, *Populus trichocarpa* (Torr.**  
303 **& Gray).** *Science* 2006, **313(5793):1596-1604.**
- 304 6. Ma T, Wang J, Zhou G, Yue Z, Hu Q, Chen Y, Liu B, Qiu Q, Wang Z, Zhang J: **Genomic**  
305 **insights into salt adaptation in a desert poplar.** *Nature communications* 2013, **4.**
- 306 7. Eckenwalder JE: **Systematics and evolution of *Populus*.** *Biology of Populus and its*  
307 *Implications for Management and Conservation* 1996, **7:30.**
- 308 8. Dickmann DI, Kuzovkina J: **Poplars and willows of the world, with emphasis on**  
309 **silviculturally important species.** *Poplars and Willows: Trees for Society and the Environment*  
310 2014, **22:8.**
- 311 9. Zhang J, Xie P, Lascoux M, Meagher TR, Liu J: **Rapidly evolving genes and stress adaptation**  
312 **of two desert poplars, *Populus euphratica* and *P. pruinosa*.** *PloS one* 2013, **8(6):e66370.**
- 313 10. Zhang J, Feng J, Lu J, Yang Y, Zhang X, Wan D, Liu J: **Transcriptome differences between**  
314 **two sister desert poplar species under salt stress.** *BMC genomics* 2014, **15(1):1.**
- 315 11. Song L, Florea L, Langmead B: **Lighter: fast and memory-efficient sequencing error**  
316 **correction without counting.** *Genome biology* 2014, **15(11):1.**
- 317 12. Xu H, Luo X, Qian J, Pang X, Song J, Qian G, Chen J, Chen S: **FastUniq: a fast *de novo***  
318 **duplicates removal tool for paired short reads.** *PloS one* 2012, **7(12):e52249.**
- 319 13. Marçais G, Kingsford C: **A fast, lock-free approach for efficient parallel counting of**  
320 **occurrences of k-mers.** *Bioinformatics* 2011, **27(6):764-770.**
- 321 14. Chang S, Puryear J, Cairney J: **A simple and efficient method for isolating RNA from pine**  
322 **trees.** *Plant molecular biology reporter* 1993, **11(2):113-116.**

- 1 323 15. Grabherr MG, Haas BJ, Yassour M, Levin JZ, Thompson DA, Amit I, Adiconis X, Fan L,  
2 324 Raychowdhury R, Zeng Q: **Full-length transcriptome assembly from RNA-Seq data**  
3 325 **without a reference genome.** *Nature biotechnology* 2011, **29**(7):644-652.
- 4 326 16. Li W, Godzik A: **Cd-hit: a fast program for clustering and comparing large sets of protein**  
5 327 **or nucleotide sequences.** *Bioinformatics* 2006, **22**(13):1658-1659.
- 6 328 17. Haas BJ, Delcher AL, Mount SM, Wortman JR, Smith Jr RK, Hannick LI, Maiti R, Ronning  
7 329 CM, Rusch DB, Town CD: **Improving the Arabidopsis genome annotation using maximal**  
8 330 **transcript alignment assemblies.** *Nucleic acids research* 2003, **31**(19):5654-5666.
- 9 331 18. Kajitani R, Toshimoto K, Noguchi H, Toyoda A, Ogura Y, Okuno M, Yabana M, Harada M,  
10 332 Nagayasu E, Maruyama H: **Efficient de novo assembly of highly heterozygous genomes from**  
11 333 **whole-genome shotgun short reads.** *Genome research* 2014, **24**(8):1384-1395.
- 12 334 19. Li R, Li Y, Kristiansen K, Wang J: **SOAP: short oligonucleotide alignment program.**  
13 335 *Bioinformatics* 2008, **24**(5):713-714.
- 14 336 20. Simão FA, Waterhouse RM, Ioannidis P, Kriventseva EV, Zdobnov EM: **BUSCO: assessing**  
15 337 **genome assembly and annotation completeness with single-copy orthologs.** *Bioinformatics*  
16 338 2015:btv351.
- 17 339 21. Vezzi F, Narzisi G, Mishra B: **Reevaluating assembly evaluations with Feature Response**  
18 340 **Curves: GAGE and Assemblathon.** *PLoS one* 2012, **7**(12):e52210.
- 19 341 22. Li H: **Aligning sequence reads, clone sequences and assembly contigs with BWA-MEM.**  
20 342 *arXiv preprint arXiv:13033997* 2013.
- 21 343 23. DePristo MA, Banks E, Poplin R, Garimella KV, Maguire JR, Hartl C, Philippakis AA, Del  
22 344 Angel G, Rivas MA, Hanna M: **A framework for variation discovery and genotyping using**  
23 345 **next-generation DNA sequencing data.** *Nature genetics* 2011, **43**(5):491-498.
- 24 346 24. Tarailo-Graovac M, Chen N: **Using RepeatMasker to identify repetitive elements in genomic**  
25 347 **sequences.** *Current Protocols in Bioinformatics* 2009:4-10.
- 26 348 25. Jurka J, Kapitonov VV, Pavlicek A, Klonowski P, Kohany O, Walichiewicz J: **Repbase Update,**  
27 349 **a database of eukaryotic repetitive elements.** *Cytogenetic and genome research* 2005, **110**(1-  
28 350 4):462-467.
- 29 351 26. Benson G: **Tandem repeats finder: a program to analyze DNA sequences.** *Nucleic acids*  
30 352 *research* 1999, **27**(2):573.
- 31 353 27. Chan AP, Crabtree J, Zhao Q, Lorenzi H, Orvis J, Puiu D, Melake-Berhan A, Jones KM,  
32 354 Redman J, Chen G *et al*: **Draft genome sequence of the oilseed species Ricinus communis.**  
33 355 *Nature biotechnology* 2010, **28**(9):951-956.
- 34 356 28. Arabidopsis Genome Initiative. **Analysis of the genome sequence of the flowering plant**  
35 357 **Arabidopsis thaliana.** *Nature* 2000, **408**(6814):796-815.
- 36 358 29. Ming R, Hou S, Feng Y, Yu Q, Dionne-Laporte A, Saw JH, Senin P, Wang W, Ly BV, Lewis  
37 359 KLT *et al*: **The draft genome of the transgenic tropical fruit tree papaya (Carica papaya**  
38 360 **Linnaeus).** *Nature* 2008, **452**(7190):991-996.
- 39 361 30. Myburg AA, Grattapaglia D, Tuskan GA, Hellsten U, Hayes RD, Grimwood J, Jenkins J,  
40 362 Lindquist E, Tice H, Bauer D *et al*: **The genome of Eucalyptus grandis.** *Nature* 2014,  
41 363 **510**(7505):356-362.
- 42 364 31. Camacho C, Coulouris G, Avagyan V, Ma N, Papadopoulos J, Bealer K, Madden TL: **BLAST+:**  
43 365 **architecture and applications.** *BMC bioinformatics* 2009, **10**(1):1.
- 44  
45  
46  
47  
48  
49  
50  
51  
52  
53  
54  
55  
56  
57  
58  
59  
60  
61  
62  
63  
64  
65

- 1  
2  
3  
4  
5  
6  
7  
8  
9  
10  
11  
12  
13  
14  
15  
16  
17  
18  
19  
20  
21  
22  
23  
24  
25  
26  
27  
28  
29  
30  
31  
32  
33  
34  
35  
36  
37  
38  
39  
40  
41  
42  
43  
44  
45  
46  
47  
48  
49  
50  
51  
52  
53  
54  
55  
56  
57  
58  
59  
60  
61  
62  
63  
64  
65
- 366 32. Birney E, Clamp M, Durbin R: **GeneWise and genomewise**. *Genome research* 2004,  
367 **14(5):988-995**.
- 368 33. Stanke M, Keller O, Gunduz I, Hayes A, Waack S, Morgenstern B: **AUGUSTUS: ab initio**  
369 **prediction of alternative transcripts**. *Nucleic acids research* 2006, **34**:W435-W439.
- 370 34. Salamov AA, Solovyev VV: **Ab initio gene finding in Drosophila genomic DNA**. *Genome*  
371 *research* 2000, **10(4):516-522**.
- 372 35. Xu Y, Wang X, Yang J, Vaynberg J, Qin J: **PASA—a program for automated protein NMR**  
373 **backbone signal assignment by pattern-filtering approach**. *Journal of biomolecular NMR*  
374 2006, **34(1):41-56**.
- 375 36. Haas BJ, Salzberg SL, Zhu W, Pertea M, Allen JE, Orvis J, White O, Buell CR, Wortman JR:  
376 **Automated eukaryotic gene structure annotation using EVIDENCEModeler and the**  
377 **Program to Assemble Spliced Alignments**. *Genome biology* 2008, **9(1):1**.
- 378 37. Bairoch A, Apweiler R: **The SWISS-PROT protein sequence database and its supplement**  
379 **TrEMBL in 2000**. *Nucleic acids research* 2000, **28(1):45-48**.
- 380 38. Hunter S, Apweiler R, Attwood TK, Bairoch A, Bateman A, Binns D, Bork P, Das U, Daugherty  
381 L, Duquenne L: **InterPro: the integrative protein signature database**. *Nucleic acids research*  
382 2009, **37**:D211-D215.
- 383 39. Kanehisa M, Goto S: **KEGG: kyoto encyclopedia of genes and genomes**. *Nucleic acids*  
384 *research* 2000, **28(1):27-30**.
- 385 40. Ashburner M, Ball CA, Blake JA, Botstein D, Butler H, Cherry JM, Davis AP, Dolinski K,  
386 Dwight SS, Eppig JT: **Gene Ontology: tool for the unification of biology**. *Nature genetics*  
387 2000, **25(1):25-29**.
- 388 41. Conesa A, Götz S: **Blast2GO: A comprehensive suite for functional analysis in plant**  
389 **genomics**. *International journal of plant genomics* 2008, **2008**.
- 390 42. Wang Y, Tang H, DeBarry JD, Tan X, Li J, Wang X, Lee T-h, Jin H, Marler B, Guo H:  
391 **MCScanX: a toolkit for detection and evolutionary analysis of gene synteny and**  
392 **collinearity**. *Nucleic acids research* 2012, **40(7):e49-e49**.
- 393 43. Kielbasa SM, Wan R, Sato K, Horton P, Frith MC: **Adaptive seeds tame genomic sequence**  
394 **comparison**. *Genome research* 2011, **21(3):487-493**.
- 395 44. Qiu Q, Zhang G, Ma T, Qian W, Wang J, Ye Z, Cao C, Hu Q, Kim J, Larkin DM: **The yak**  
396 **genome and adaptation to life at high altitude**. *Nature genetics* 2012, **44(8):946-949**.
- 397 45. Li L, Stoeckert Jr. CJ, Roos DS: **OrthoMCL: Identification of Ortholog Groups for**  
398 **Eukaryotic Genomes**. *Genome Res* 2003, **13(1):2178-2189**.
- 399 46. Edgar RC: **MUSCLE: a multiple sequence alignment method with reduced time and space**  
400 **complexity**. *BMC Bioinformatics* 2004, **5**:113-113.
- 401 47. Castresana J: **Selection of Conserved Blocks from Multiple Alignments for Their Use in**  
402 **Phylogenetic Analysis**. *Molecular Biology and Evolution* 2000, **17(4):540-552**.
- 403 48. Talavera G, Castresana J: **Improvement of Phylogenies after Removing Divergent and**  
404 **Ambiguously Aligned Blocks from Protein Sequence Alignments**. *Systematic Biology* 2007,  
405 **56(4):564-577**.
- 406 49. Stamatakis A: **RAxML version 8: a tool for phylogenetic analysis and post-analysis of large**  
407 **phylogenies**. *Bioinformatics* 2014, **30(9):1312-1313**.
- 408 50. Yang Z: **PAML 4: phylogenetic analysis by maximum likelihood**. *Molecular biology and*  
409 *evolution* 2007, **24(8):1586-1591**.

1  
2  
3  
4  
5  
6  
7  
8  
9  
10  
11  
12  
13  
14  
15  
16  
17  
18  
19  
20  
21  
22  
23  
24  
25  
26  
27  
28  
29  
30  
31  
32  
33  
34  
35  
36  
37  
38  
39  
40  
41  
42  
43  
44  
45  
46  
47  
48  
49  
50  
51  
52  
53  
54  
55  
56  
57  
58  
59  
60  
61  
62  
63  
64  
65

410 51. De Bie T, Cristianini N, Demuth JP, Hahn MW: **CAFE: a computational tool for the study of**  
411 **gene family evolution.** *Bioinformatics* 2006, **22**(10):1269-1271.  
412 52. Yang W, Wang K, Zhang J, Ma J, Liu J, Ma T. Supporting data for “**The draft genome sequence**  
413 **of a desert tree *Populus pruinosa*”.** *GigaScience Database* 2017, <http://dx.doi.org/xxxxx>.  
414  
415  
416  
417  
418

1      419    **Additional file**

2  
3  
4      420    Additional file 1: Supplementary tables and figures.

5  
6      421    Table S1: Summary of clean reads after the raw reads from the Illumina platform had  
7      422    been filtered using Lighter and FastUniq.

8  
9      423    Table S2: Statistics for *P. pruinosa* RNA-seq data.

10  
11     424    Table S3: Statistics for the final assembly of the *P. pruinosa* genome.

12  
13     425    Table S4: Summary of BUSCO analysis.

14  
15     426    Table S5. Evaluation of gene space completeness for the *P. pruinosa* genome.

16  
17     427    Table S6: Prediction of repetitive elements in the *P. pruinosa* genome.

18  
19     428    Table S7: Classification of repetitive elements in the *P. pruinosa* genome.

20  
21     429    Table S8: Statistics of predicted protein-coding genes in the *P. pruinosa* genome.

22  
23     430    Table S9: Functional annotation of predicted genes for *P. pruinosa*.

24  
25     431    Table S10: Summary of syntenic blocks between *P. pruinosa* and *P. euphratica*  
26     432    identified using MCSScanX.

27  
28     433    Table S11: Top 10 GO categories (biological process and molecular function)  
29     434    displaying the highest Ka/Ks ratios between *P. pruinosa* and *P. euphratica*.

30  
31     435    Table S12: Summary of gene family clustering.

32  
33     436    Table S13. Analysis of *P. pruinosa* species-specific genes.

34  
35     437    Table S14: GO enrichment analysis of species-specific genes in the *P. pruinosa* genome.

36  
37     438    Table S15: GO enrichment analysis of expanded gene families in the *P. pruinosa*  
38     439    genome.

39  
40     440    Figure S1: 17-mer analysis for *P. pruinosa* genome based on clean reads from paired-  
41     441    end libraries.

42  
43     442    Figure S2: Flow cytometry estimate of the *P. pruinosa* genome size compared to  
44     443    reference standard of *Vigna radiate* (543Mb).

45  
46     444    Figure S3: GC content distribution for the genomes of *P. pruinosa* and related poplar  
47     445    species, established by 500 bp non-overlapping sliding windows.

48  
49     446    Figure S4: FRCurve of four genome assemblies.

50  
51     447    Figure S5: Sequencing depth distribution for the *P. pruinosa* genome.

52  
53     448    Figure S6: Comparison of mRNA length (A), CDS length (B), Exon length (C), Intron  
54     449    length (D), and Exon number per gene (E) in *P. pruinosa* and in related poplar species.

55  
56  
57  
58  
59  
60  
61  
62  
63  
64  
65



1  
2  
3  
4  
5  
6  
7  
8  
9  
10  
11  
12  
13  
14  
15  
16  
17  
18  
19  
20  
21  
22  
23  
24  
25  
26  
27  
28  
29  
30  
31  
32  
33  
34  
35  
36  
37  
38  
39  
40  
41  
42  
43  
44  
45  
46  
47  
48  
49  
50  
51  
52  
53  
54  
55  
56  
57  
58  
59  
60  
61  
62  
63  
64  
65

450 Figure S7: Genome duplication in *Populus* genomes as revealed by Ks analyses.  
451 Figure S8: Distribution of Ka, Ks, Ka/Ks and protein similarity in 1:1 *P. pruinosa*-*P.*  
452 *euphratica* orthologs within syntenic blocks.  
453 Figure S9: Phylogenetic relationships of *P. pruinosa* and 10 other plant species.  
454 Figure S10: Estimation of divergence time between *P. pruinosa* and *P. euphratica* using  
455 phylogenetic analysis.  
456 Figure S11: Dynamic evolution of orthologous gene families.  
457

**Table 1. Summary of genome assembly and annotation of *P. pruinosa*.**

| <b>Genome assembly</b>         |                         |
|--------------------------------|-------------------------|
| <b>Estimate of genome size</b> | 590 Mb                  |
| <b>GC content</b>              | 31.80%                  |
| <b>Contigs</b>                 |                         |
| N50 size                       | 14,011 bp               |
| Longest                        | 197,623 bp              |
| Total number                   | 170,219                 |
| Total size                     | 450,157,195 bp          |
| <b>Scaffolds</b>               |                         |
| N50 size                       | 698,525 bp              |
| Longest                        | 10,688,665 bp           |
| Total number                   | 78,960                  |
| Total length                   | 479,307,600 bp          |
| <b>Genome annotation</b>       |                         |
| <b>Transposable elements</b>   |                         |
| LTR                            | 142,923,156 bp (29.82%) |
| LINE                           | 4,956,260 bp (1.03%)    |
| DNA                            | 20,990,612 bp (4.38%)   |
| Total                          | 213,236,753 bp (45.47%) |
| <b>Protein coding genes</b>    |                         |
| Total number                   | 35,131                  |
| Mean transcript length         | 3703.4 bp               |
| Mean coding sequence length    | 1224.38 bp              |
| Mean exon length               | 226.27 bp               |
| Mean intron length             | 561.98 bp               |
| <b>Functional annotation</b>   |                         |
| GO                             | 22,361 (63.64%)         |
| KEGG                           | 11,746 (33.43%)         |
| Total                          | 30,938 (88.06%)         |

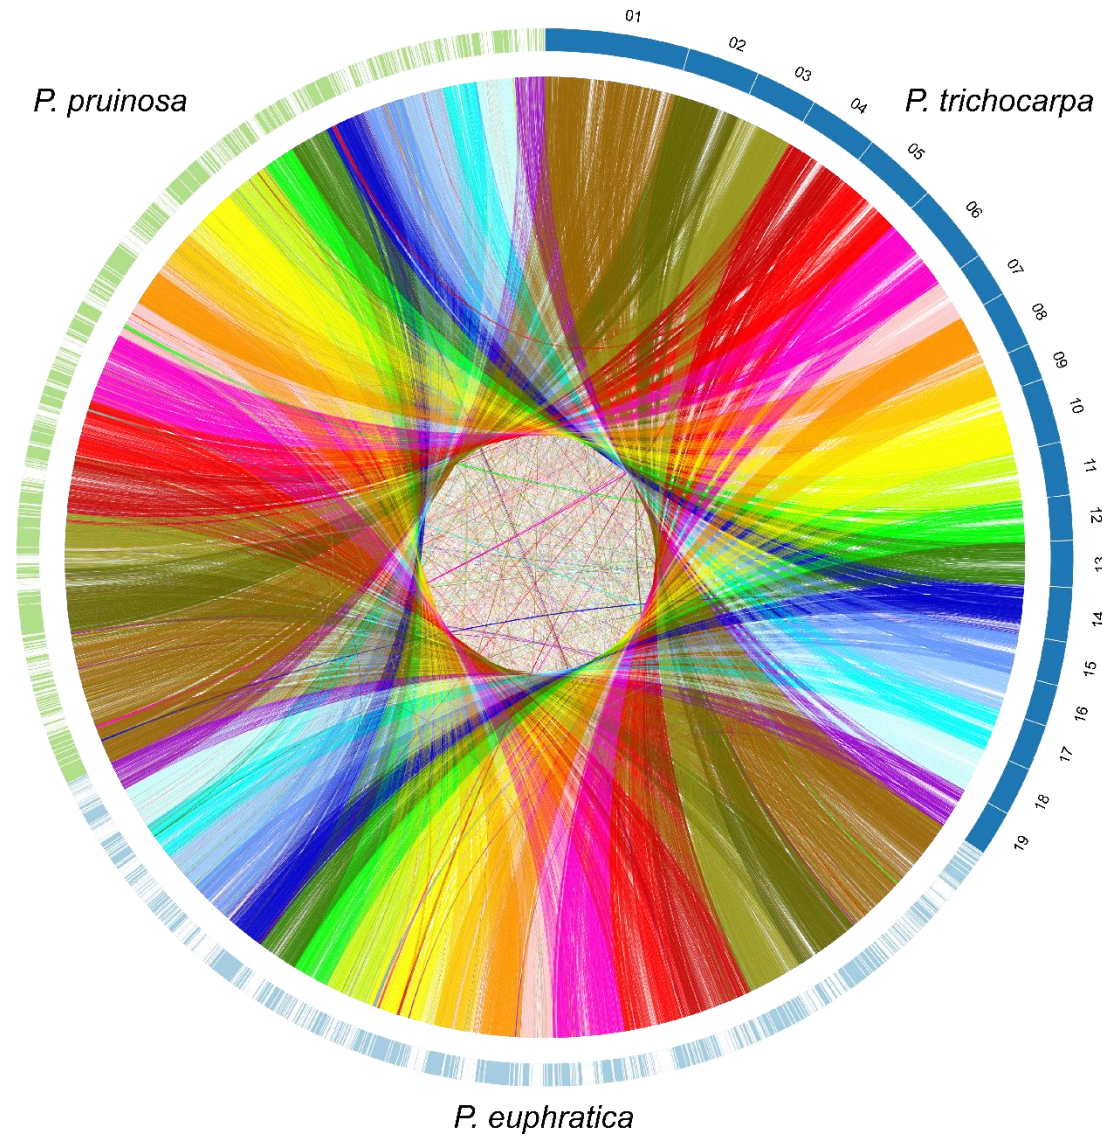

**Figure 1. Synteny relationship of *P. pruinosa*, *P. euphratica* and *P. trichocarpa*.**

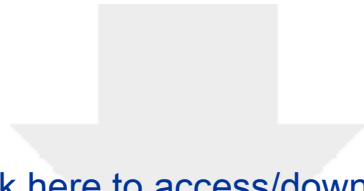

Click here to access/download  
**Supplementary Material**  
PprGenome-V11-supplement.pdf

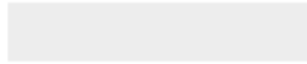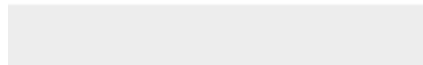

Dear Editor,

Please find the revised manuscript entitled ‘**The draft genome sequence of a desert tree *Populus pruinosa***’. We thank you and the reviewers for the time taken to review our manuscript.

Having revised the manuscript thoroughly point to point according to the suggestions of you and the second reviewers, we believe that the results and the format of our manuscript are now more suitable for publication in *GigaScience*.

Please do not hesitate to contact us if you require additional information in the context of this submission.

Best wishes

Sincerely yours,

Tao Ma
